# Supplementary material
Source: PubMed Central journal article supplement (PMC2936691)
Supplement: NIHMS229325-supplement-supplement_1.pdf [file NIHMS229325-supplement-supplement_1.pdf]

**Estradiol Stimulates Capillary Formation by Human Endothelial Progenitor Cells: Role of  
ER- $\alpha$ / $\beta$ , Heme Oxygenase-1 and Tyrosine Kinase**

**Supplementary Materials and Methods**

Isabella Baruscotti\*, Federica Barchiesi\*, Edwin K Jackson<sup>§‡</sup>, Bruno Imthurn\*, Ruth Stiller\*, Jai-Hyun Kim<sup>¶</sup>, Sara Schaufelberger\*, Marinella Rosselli\*, Christopher CW Hughes<sup>¶#</sup>, Raghvendra K. Dubey<sup>\*§</sup>

\*Department of Obstetrics and Gynecology, Clinic for Reproductive Endocrinology, University Hospital Zurich, 8091 Zurich, Switzerland; Departments of §Medicine and of ‡Pharmacology and Chemical Biology, University of Pittsburgh School of Medicine, Pittsburgh, PA-15213-2582, USA; ¶Department of Molecular Biology and Biochemistry and #Edwards Lifesciences Center for Advanced Cardiovascular Technology, University of California, Irvine CA-92679

**Running Title:** Estradiol promotes EPC angiogenesis via ER- $\alpha$

**Corresponding Author Address:**

Dr. Raghvendra K. Dubey  
Department of Obstetrics and Gynecology  
Clinic for Reproductive Endocrinology (D217)  
University Hospital Zurich  
CH-8091 Zurich, Switzerland.  
Tel: (41)-1-255-8608  
Fax: (41)-1-255-4439  
E-mail: raghvendra.dubey@usz.ch

**Isolation and Culture of Endothelial Progenitor Cells (EPCs):** EPCs were isolated and cultured as previously described<sup>1</sup>. Sample collection for the study was approved by the institutional ethics commission at University Hospital Zurich and written consent was obtained prior to blood collection. Briefly, peripheral blood (10ml) was collected in heparinized tubes from women undergoing in vitro fertilization treatment. White blood cells were isolated by gradient centrifugation using Biocoll (1.077 g/ml; Biochrom AG, Germany) and washed twice with buffer (2 mM EDTA in phosphate-buffered saline). CD34 positive cells were selectively separated using magnetic beads coated with CD34 antibodies. The purity of the isolated CD34 positive cells was confirmed by staining with antibodies to AC133, a marker for stem cell glycoprotein that is selectively expressed in CD34 positive progenitor cells. CD34 positive cells were resuspended in phenol red-free endothelial basal medium (Lonza Group Ltd, Switzerland) supplemented with EGM-2 SingleQuot Kit (Lonza Group Ltd, Switzerland) and 20% fetal calf serum, plated at a density of  $2.5 \times 10^6$  cells/well in 24-well fibronectin-coated plates (BD Biosciences, USA) and cultured under standard tissue culture conditions. Following 4-6 weeks in culture, EPCs were plated in 75 cm<sup>2</sup> flasks, and upon confluency cells were characterized for specific endothelial cell markers (von Willebrand factor, PECAM-1 and MCAM-1) using endothelial cell characterization kit (Chemicon–Millipore, Billerica, US) and re-plated at split ratios of 1:4 (**for antibody details see Table-1 below**).

**Capillary Formation Studies:** To assess EPC-induced microvessel formation, EPCs in 3rd passage were serum starved overnight in DMEM-F12, phenol red-free medium (Gibco, Invitrogen Corporation, USA) supplemented with 0.4% steroid-free serum. Subsequently, 200 µl aliquots containing 50,000 cells and the various experimental agents were layered on 8-well chamber slides coated with matrigel (BD Biosciences, USA) and incubated under standard tissue culture condition.<sup>2,3</sup> After 4 hours, microvessel formation was analyzed using an Olympus inverted microscope (4x magnification) and photomicrographs. The capillary length was randomly measured at 10 separate locations and the average compared to the untreated control. DMSO at a final concentration of 0.1% was used as a vehicle-treated control.

**Lumen and Sprout Formation:** To investigate whether estradiol induces lumen and sprout formation in EPC derived endothelial cells we utilized collagen gel and Cytodex3 beads in fibrin gels, respectively and as previously described<sup>4,5,6</sup>. Briefly, for lumen formation studies, EPC-EC were seeded into collagen gels (3.75mg/ml) in EGM2 medium and incubated for 24-hrs as follows: (a) control; (b) VEGF (40ng/ml); (c) estradiol (E2,10nmol/L); or (d), positive control (phorbol myristate acetate [PMA;50ng/ml] + VEGF). Cultures were subsequently fixed in 2%paraformaldehyde, stained with toluidine blue, photographed and the number of lumens counted microscopically (original magnification 100x). For sprout formation assays, EPC-EC-coated Cytodex3 beads in fibrin gels were cultured in EGM2 medium as follows: (a) without VEGF; (b) with VEGF (15ng/ml); (c) with estradiol (E2,10nmol/L); or (d) with VEGF+E2. After 7 days the gels were photographed and the number of sprouts counted under a microscope (original magnification 100x).

**Protein Expression Studies:** Western blotting was employed to assess the role of various proteins in mediating the angiogenic effects of estradiol on EPCs. Briefly, EPCs in 3rd to 5th passages were grown to sub-confluence in 35mm<sup>2</sup> culture dishes and were serum starved for 12

hours. Subsequently, EPCs were treated with different agents for either 15 minutes for HO-1 expression studies, 10 minutes for tyrosine kinase receptor (TRK) activity and phosphorylated vascular endothelial growth factor receptor-2 (p-VEGFR-2), 30 minutes for phosphorylated Akt (Akt-P) and phosphorylated ERK (ERK-P), or 8 and 24 hours for VEGFR-2. Cells were washed with ice cold buffer and lysed in 50 µl of lysis buffer (Cell signalling Technology Inc., USA). Protein was assayed using the BCA protein assay kit (Pierce, USA), and the expressions of ERs, HO-1, Akt-P, ERK-P and VEGFR-2 were analyzed by Western blotting. TRK activity and phosphorylated-VEGFR-2 in cell lysates were measured using Antibody Beacon tyrosine kinase assay kit (Molecular Probes, Eugene, OR) and DuoSet sandwich ELISA kit (Abingdon, OX14 3NB, UK), respectively. VEGFR-2 expression on EPCs was also analyzed by flow cytometry and Western blotting. VEGF levels in supernatants of EPCs treated with estradiol for 8 hours were assayed using ELISA kit (Invitrogen Corp., Camarillo, CA, USA).

**Statistics:** Data were analyzed by analysis of variance, and statistical significance ( $p < 0.05$ ) calculated using Fisher's LSD test.

### References:

1. Dzau VJ, Gneccchi M, Pachori AS, Morello F, Melo LG. Therapeutic potential of endothelial cells in cardiovascular diseases. *Hypertension*.2005;46:7-18.
2. Salvucci O, Yao S, Villalba S, Sajewicz A, Pittluga S, Tosato G. Regulation of endothelial cell branching morphogenesis by endogenous chemokine stromal-derived factor-1. *Blood*.2004; 99:2703-2711.
3. Staton CA, Stribbling SM, Tazzyman S, Huges R, Brown NJ, Lweis CE. Current methods for assaying angiogenesis in vitro and in vivo. *Int J Exp Pathol*.2004;85:233-248.
4. Nakatsu MN, Sainson RC, Aoto JN, Taylor KL, Aitkenhead M, Pérez-del-Pulgar S, Carpenter PM, and Hughes CCW. Angiogenic sprouting and capillary lumen formation modeled by human umbilical vein endothelial cells (HUVEC) in fibrin gels: the role of fibroblasts and Angiopoietin-1. *Microvasc Res*. 2003;66, 102-112.
5. Nakatsu MN and Hughes CCW. An optimized three-dimensional in vitro model for the analysis of angiogenesis. *Methods in Enzymology*.2008;443: 65-82
6. Koh W, Stratman AN, Sacharidou A, and Davis GE. In vitro three dimensional collagen matrix models of endothelial lumen formation during vasculogenesis and angiogenesis. *Methods in Enzymology*.2008;443: 83-101.

**Table S1: List of antibodies used for EPC and endothelial cell characterization.**

| Antibody                                        | Company                                           | Cat #             | Concentration                                     | Dilution used                          |
|-------------------------------------------------|---------------------------------------------------|-------------------|---------------------------------------------------|----------------------------------------|
| Anti-HO-1                                       | Abcam plc,<br>Cambridge, UK                       | Cat # ab13248     | 1 mg/ml                                           | 4 µg/ml                                |
| IRDye 680<br>conjugated Goat<br>Anti-Mouse IgG  | Li-Cor Biosciences,<br>Lincoln, US                | Cat # 926-32220   | 1 mg/ml                                           | 1:10000                                |
| Anti-β-actin                                    | Sigma-Aldrich<br>Chemie GmbH,<br>Buchs, CH        | Cat # A-5441      |                                                   | 1:5000                                 |
| Anti-ERα                                        | Alexis<br>Biochemicals                            | Cat #210-201-C050 | 1 µg/µl                                           | 1:1000                                 |
| Anti-ERβ                                        | Alexis<br>Biochemicals                            | Cat #210-180-C050 | 1 µg/µl                                           | 1:1000                                 |
| IRDye 680<br>conjugated Goat<br>Anti-Rabbit IgG | Li-Cor Biosciences,<br>Lincoln, US                | Cat # 926-32221   | 1 mg/ml                                           | 1:10000                                |
| Anti-AC133-APC                                  | Miltenyi Biotec,<br>Bergisch Gladbach,<br>D       | Cat # 130-090-826 | 100 µg/ml                                         | 1:10                                   |
| Anti-CD34-FITC                                  | Miltenyi Biotec,<br>Bergisch Gladbach,<br>D       | Cat # 130-081-001 |                                                   | 1:10                                   |
| Endothelial cell<br>characterization kit        | Chemicon<br>(Millipore),<br>Billerica, US         | Cat # SCR023      | CD146: 1 mg/ml<br>VWF: 1 mg/ml<br>CD31: 0.1 mg/ml | CD146 1:500<br>vWF 1:5000<br>CD31 1:50 |
| Anti-Mouse IgG –<br>FITC                        | Sigma-Aldrich<br>Chemie GmbH,<br>Buchs, CH        | Cat # F-2012      |                                                   | 1:64                                   |
| Anti-Rabbit IgG –<br>FITC                       | Sigma-Aldrich<br>Chemie GmbH,<br>Buchs, CH        | Cat # F-0382      |                                                   | 1:80                                   |
| Anti-Phospho-Akt<br>(Thr 308)                   | Cell Signaling<br>Technology<br>Inc.,Beverly, US  | Cat # 9275        |                                                   | 1:1000                                 |
| Anti-Akt                                        | Cell Signaling<br>Technology Inc.,<br>Beverly, US | Cat # 9272        |                                                   | 1:1000                                 |
| Anti-phospho-MAP<br>Kinase 1/2 (Erk1/2)         | Upstate<br>Biotechnology,<br>Lake Placid,<br>US   | Cat # 07-467      | 0.28 mg/ml                                        | 1:1000                                 |
| Anti-MAP<br>Kinase/Erk1/2-CT                    | Upstate<br>Biotechnology,<br>Lake Placid,US       | Cat # 06-182      | 0.55 mg/ml                                        | 1:1000                                 |
| Anti VEGFR-2                                    | Calbiochem,<br>Merck KgaA,<br>Darmstadt, D        | Cat # 676486      | 1 mg/ml                                           | 1:1000                                 |

**Figure S1**

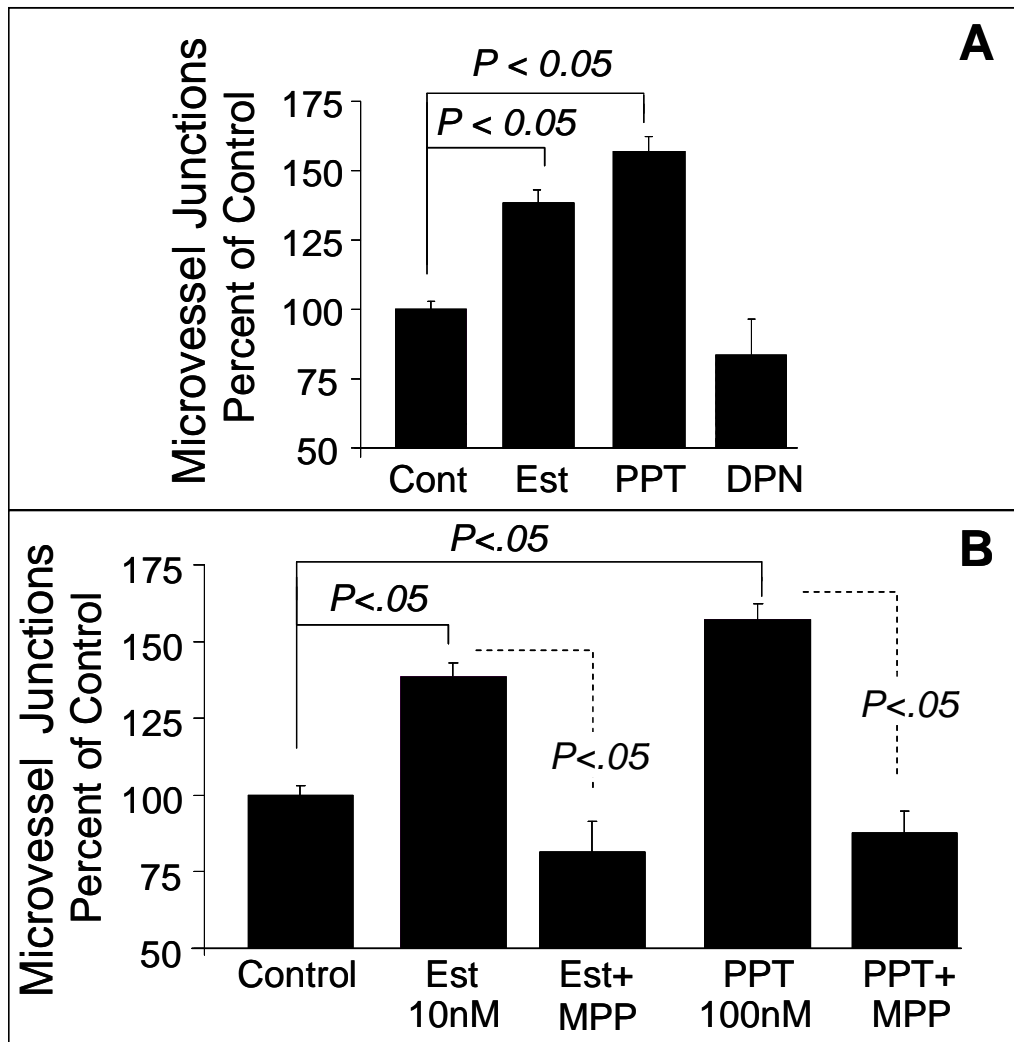

**Figure S1:** (A) Bar graph showing the effects of estradiol (Est; 10nmol/L), PPT (ER $\alpha$  agonist; 100nmol/L) and DPN (100nmol/L) on capillary formation by EPCs. Serum starved EPCs were plated at a density of 50'000 cells/200 $\mu$ l / well on matrigel coated 8-well multichamber slides. After 4-hrs the capillary formation was assessed by randomly counting the number of sprouting junctions at 4 different locations under a microscope and 4x magnification. (B) Bar graph showing the effects of estradiol (10nmol/L) and PPT (100nmol/L) on EPC-induced capillary formation in the presence and absence of ER $\alpha$  antagonist MPP (1 $\mu$ mol/L). Values represent means $\pm$ SEM.

**Figure S2**

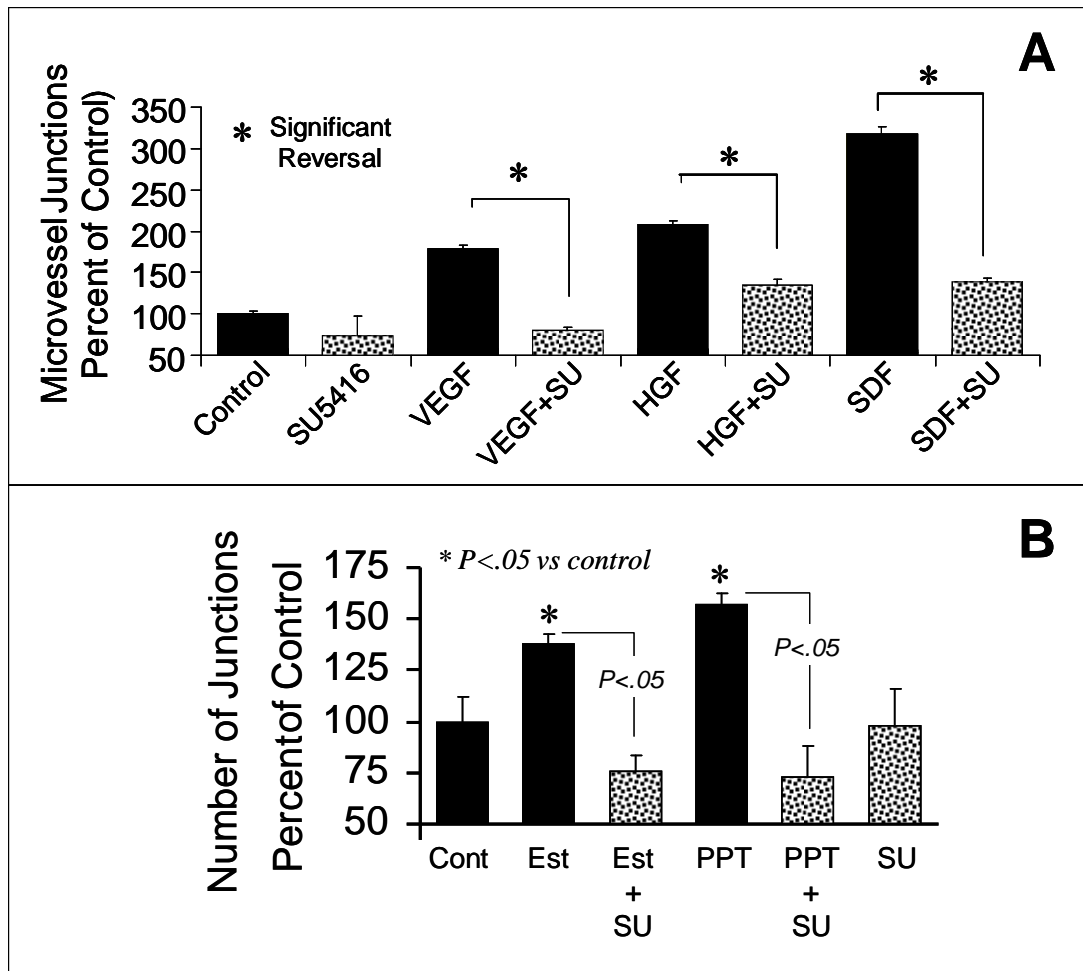

**Figure S2:** (A) Bar graph showing the effects of tyrosine kinase stimulators vascular endothelial growth factor (VEGF;100ng/mL), hepatocyte growth factor (HGF, 100ng/mL) and stromal cell-derived growth factor (SDF-1 100ng/mL) on capillary junction formation by EPCs in the presence and absence of tyrosine kinase inhibitor SU5416 (SU; 5 $\mu$ mol/L). Serum starved EPCs were plated at a density of 50'000 cells/200 $\mu$ l / well on matrigel coated 8-well multichamber slides. After 4 hrs the capillary junction formation was assessed by randomly counting the number of sprouting junctions at 4 different locations under a microscope and 4x magnification. (B) Bar graph showing the modulatory effects of tyrosine kinase inhibitor SU5416 (SU; 5 $\mu$ mol/L) on estradiol (10nmol/L) and PPT (100nmol/L) induced capillary junction formation in EPCs. Values represent means $\pm$ SEM. \*  $p < 0.05$  versus vehicle treated controls.

**Figure S3**

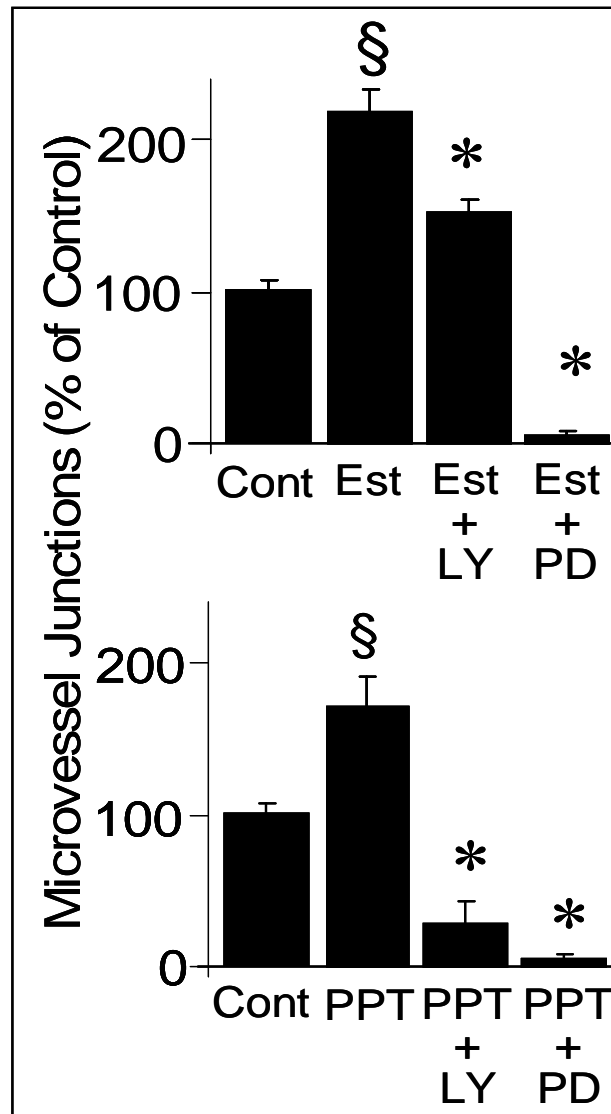

**Figure S3:** Bar graph showing the inhibitory effects LY294002 (Akt inhibitor; LY; 10 $\mu$ mol/L) and PD98059 (ERK1/2-P inhibitor; PD; 10 $\mu$ mol/L) on estradiol (Est; 10nmol/L) and PPT (100nmol/L) induced capillary junction formation by EPCs. EPCs were pretreated for 15-minutes with either LY or PD and subsequently Est or PPT added for another 4-hrs and capillary formation analyzed microscopically at 4x mag. \*  $p < 0.05$  vs Estradiol or PPT alone.

**Figure S4**

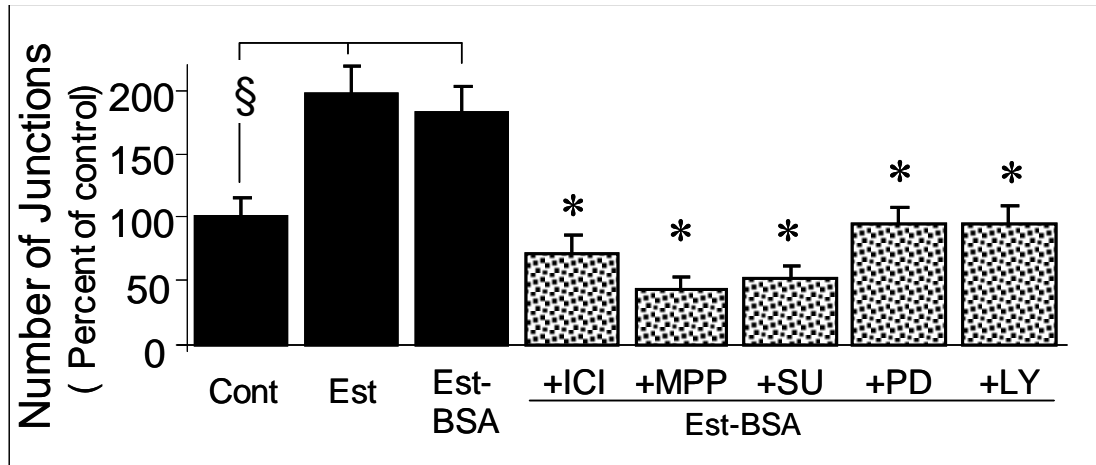

**Figure S4:** Bar graph showing the modulatory effects of tyrosine kinase inhibitor SU5416 (SU; 5 $\mu$ mol/L), LY294002 (Akt pathway inhibitor; LY, 10 $\mu$ mol/L) and PD98059 (ERK1/2 pathway inhibitor; PD, 10 $\mu$ mol/L) and MPP (ER $\alpha$  antagonist, 1 $\mu$ mol/L) on BSA-estradiol (Est-BSA, 10nmol/L) induced capillary formation in EPCs. Serum starved EPCs were plated at a density of 50,000 cells/200 $\mu$ l/well on matrigel coated 8-well multichamber slides. Cells were pretreated for 15-minutes with MPP, SU, LY, or PD and subsequently BSA-estradiol was added for an additional 4-hours and capillary junction formation assessed by randomly counting the number of sprouting junctions at 4 different locations under a microscope at 4x magnification. Values represent means $\pm$ SEM. §p<0.05 versus vehicle treated controls; \*p<0.05 versus Est-BSA.
